# Supplementary material
Source: MDPI journal article supplement (https://www.mdpi.com/1999-4907/13/1/133)
Supplement: s1 [file s1]

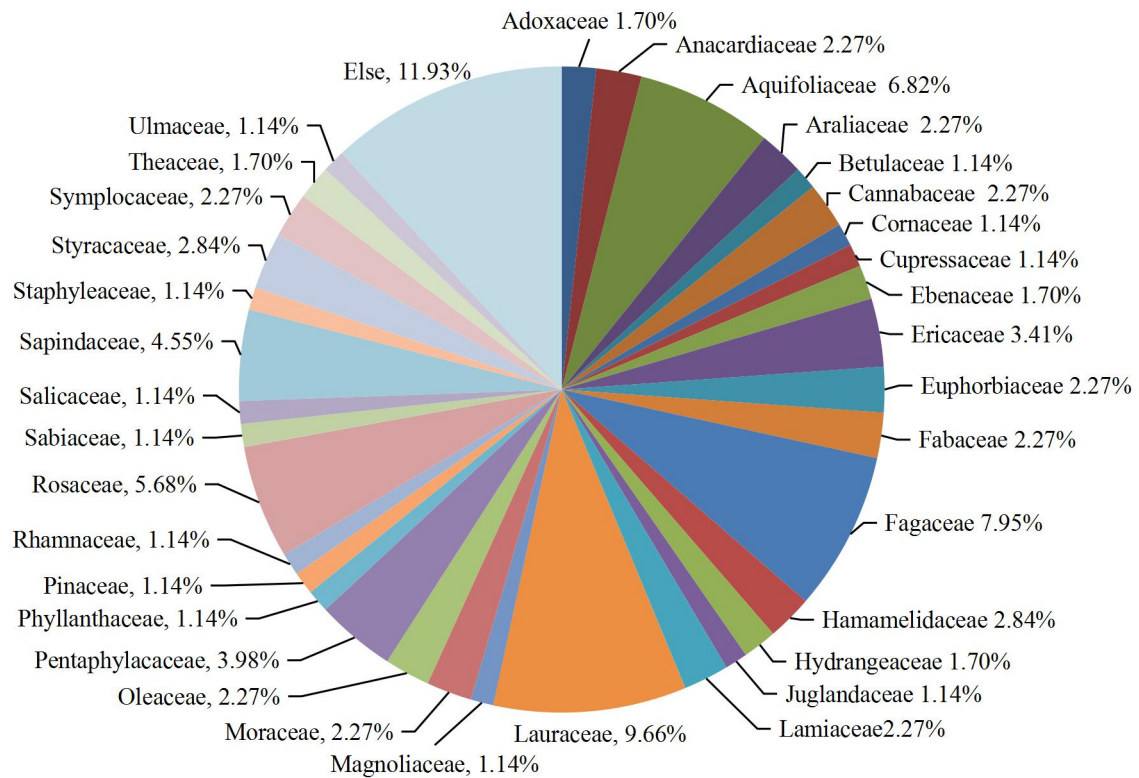

Figure S1 Total diversity of trees and shrubs from three plots measured by species richness (176 species), family richness (54 families), and the percentage of species in each family. Else (11.93%) means an aggregation of plant families represented by a single species. The Angiospermae are classified based on APG IV (The Angiosperm Phylogeny Group, 2016), and the Gymnospermae are classified according to Flora of China.
