# Supplementary material
Source: MDPI journal article supplement (https://www.mdpi.com/1999-4907/13/1/133)
Supplement: s1 [file s1]

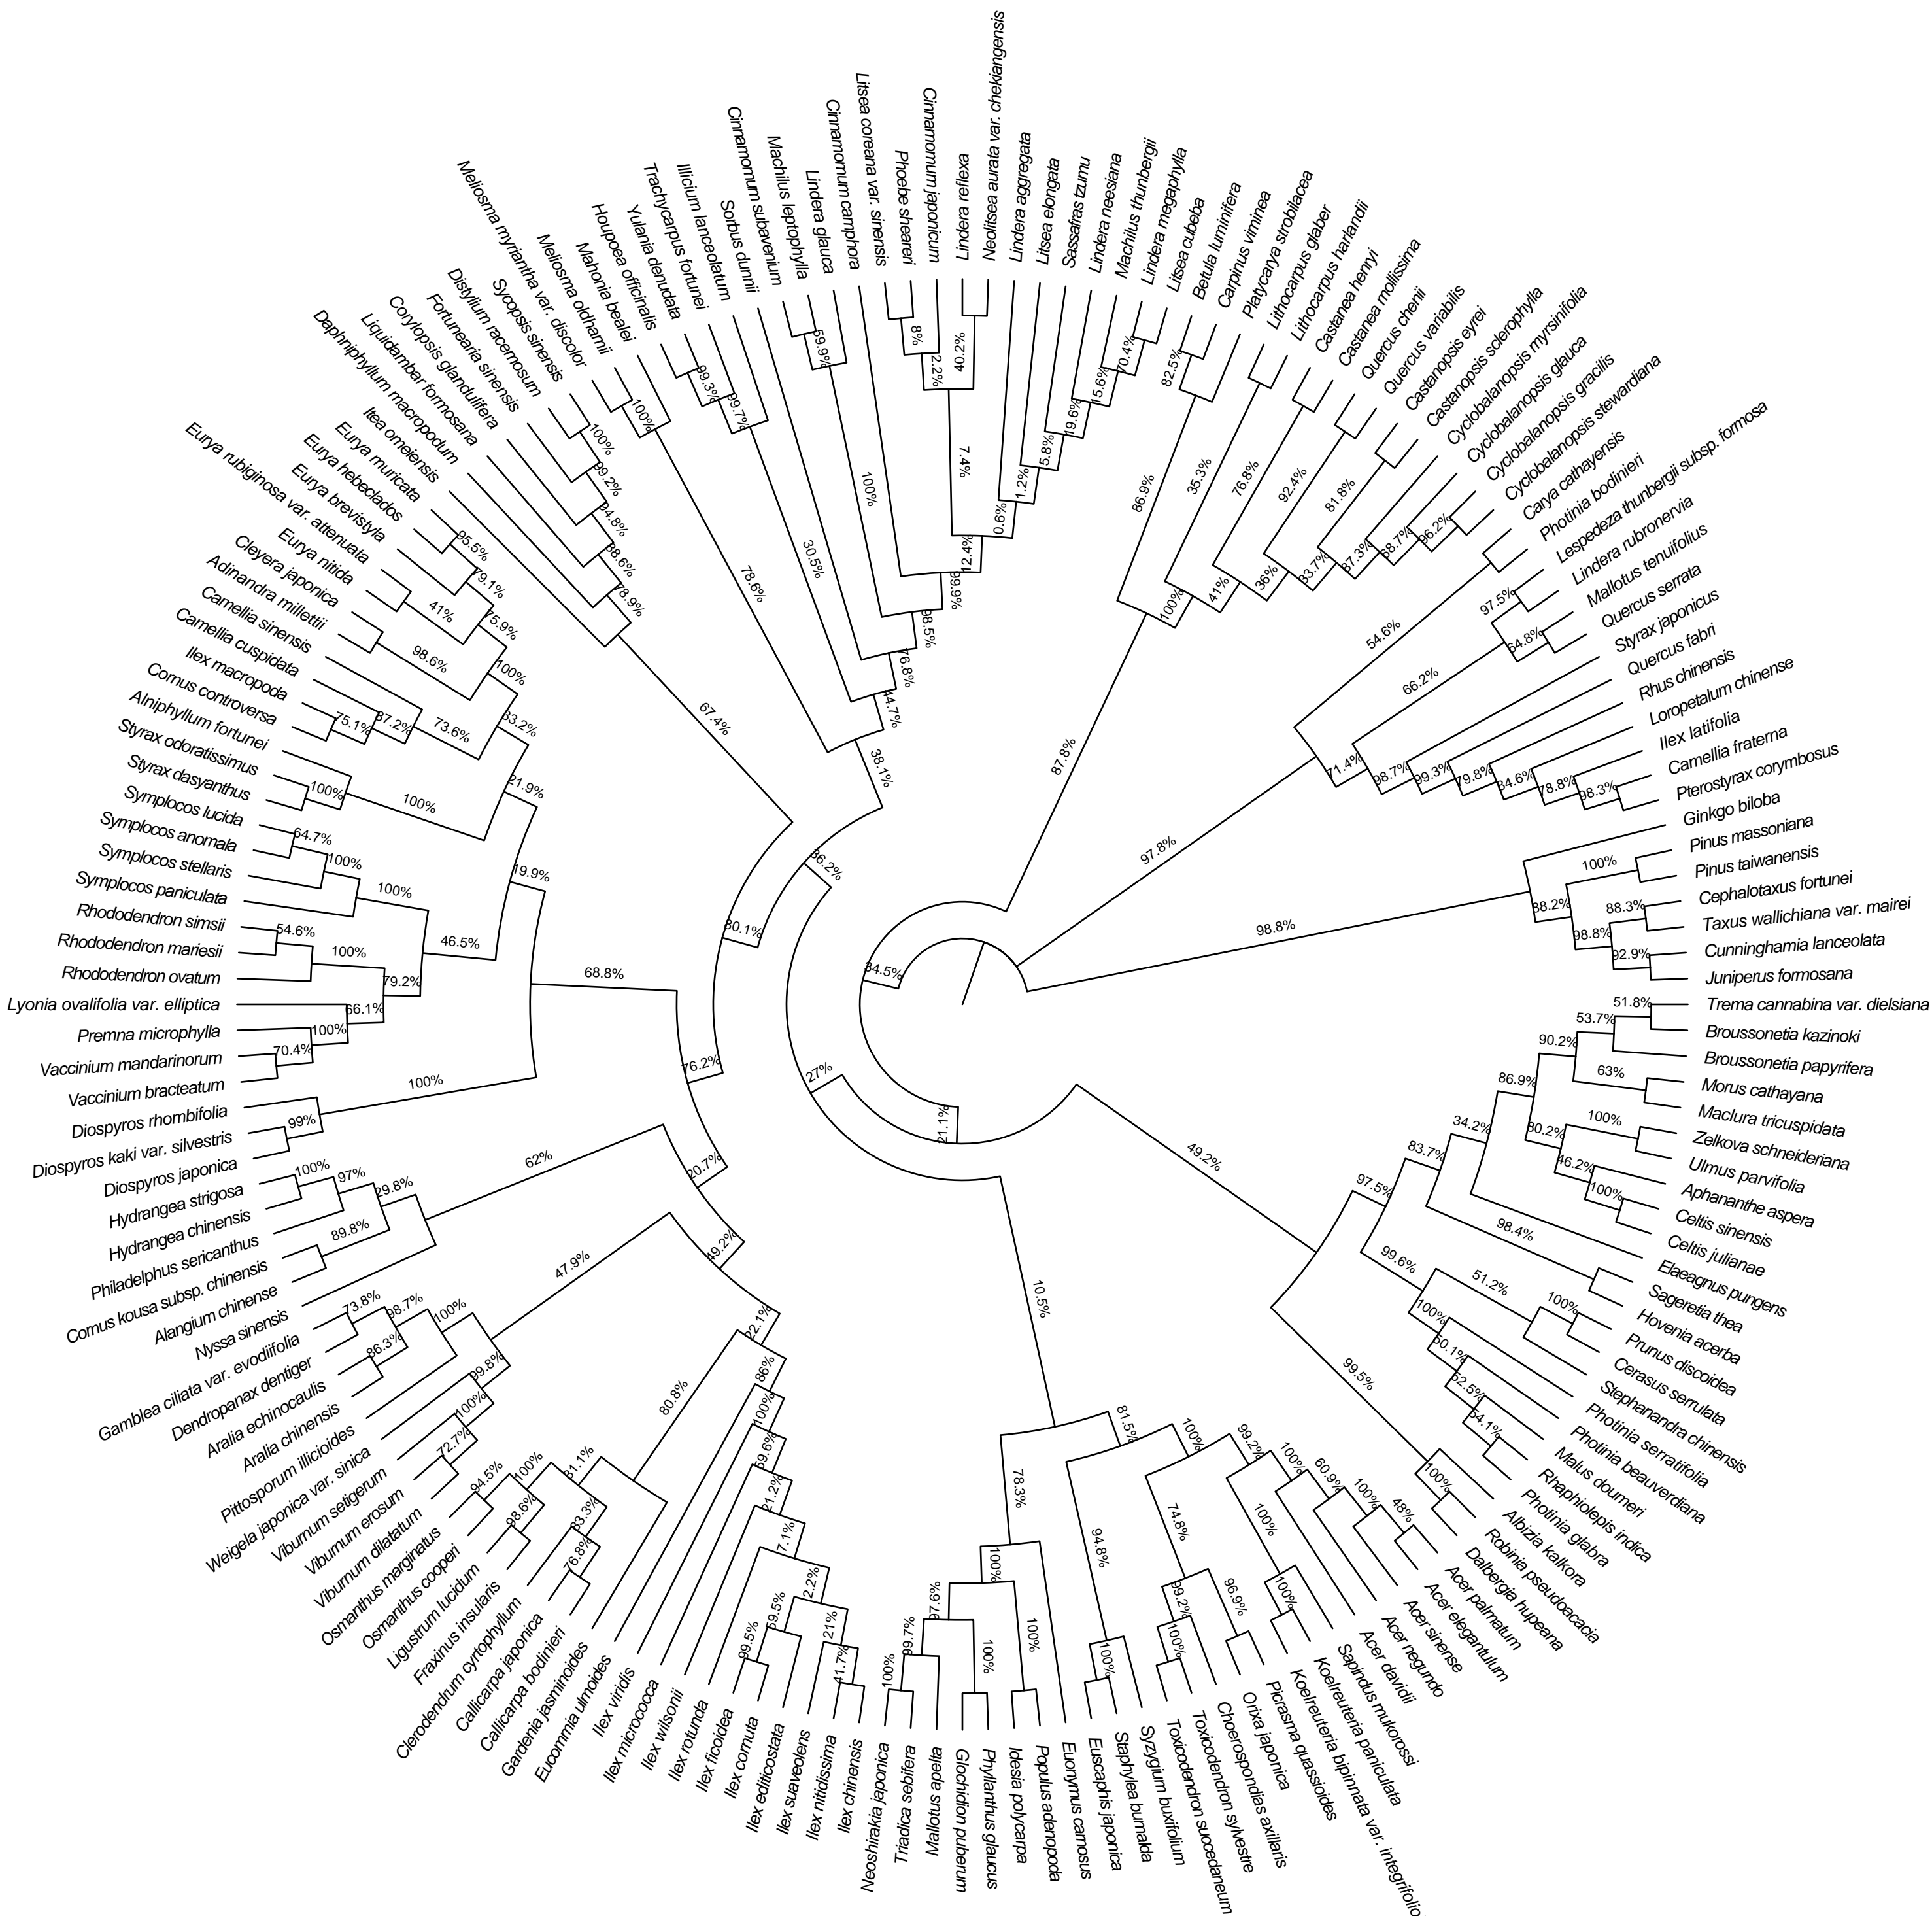

Figure S3. Community phylogenetic tree of 176 species at Mt. Huangshan constructed with a supermatrix of sequence data from three DNA barcode loci (ITS2+ rbcL+ matK) of the 176 species. The numbers on the nodes of the circular dendrogram represent the support rate.
