# Supplementary material
Source: MDPI journal article supplement (https://www.mdpi.com/1999-4907/13/1/133)
Supplement: s1 [file s1]

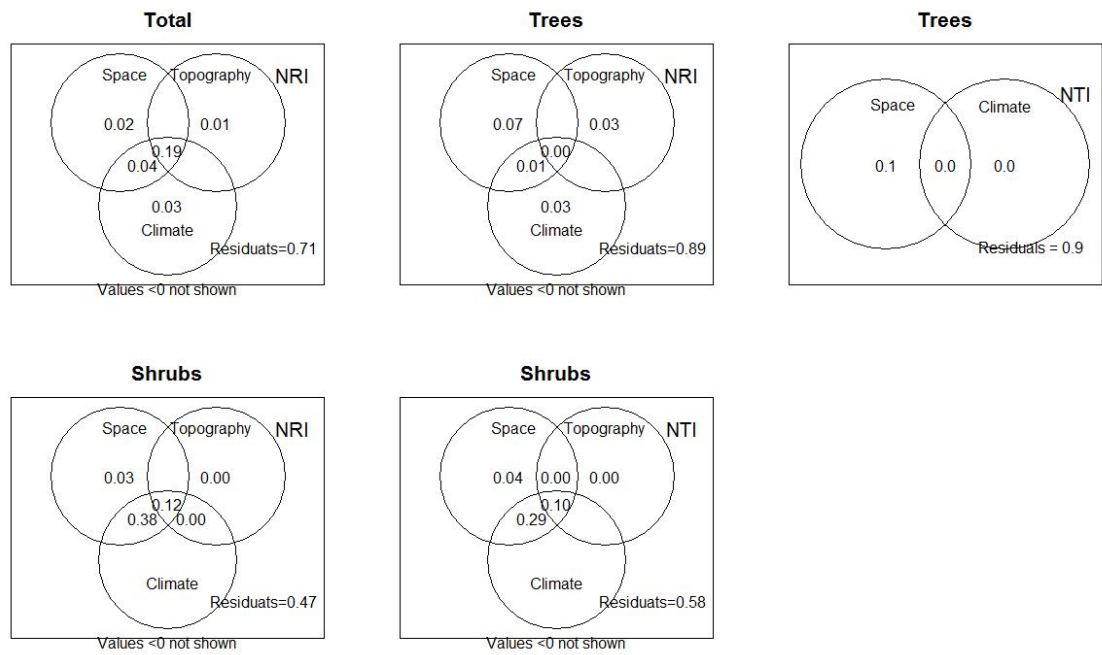

Figure S5 Partitioning of variation in nearest taxa index (NTI) and net relatedness index (NRI) of different life forms.
