# Supplementary material
Source: MDPI journal article supplement (https://www.mdpi.com/1999-4907/13/1/133)
Supplement: s1 [file s1]

Table S1 PCR and sequencing results for 176 species collected in three plots at Mt. Huangshan.

|                           | ITS2        |            | rbcL        |            | matK         |            |
|---------------------------|-------------|------------|-------------|------------|--------------|------------|
|                           | PCR         | Sequencing | PCR         | Sequencing | PCR          | Sequencing |
| NO. of species (176)      | 172         | 167        | 171         | 171        | 156          | 145        |
| Percentage of success (%) | 97.72%      | 97.09%     | 97.15%      | 100%       | 88.63%       | 92.94%     |
| Length(bp)                | 186bp~484bp |            | 529bp~777bp |            | 602bp~1603bp |            |
| G+C (%)                   | 63.72%      |            | 43.56%      |            | 34.19%       |            |

Table S2 Sequence accession numbers and species information from GenBank

| Family             | Genus                  | Species                                           | Accession Number |
|--------------------|------------------------|---------------------------------------------------|------------------|
| Adoxaceae          | <i>Viburnum</i>        | <i>Viburnum erosum</i>                            | JF944770.1       |
| Aquifoliaceae      | <i>Ilex</i>            | <i>Ilex micrococca</i>                            | AJ492684.1       |
| Aquifoliaceae      | <i>Ilex</i>            | <i>Ilex rotunda</i>                               | HQ415255.1       |
| Aquifoliaceae      | <i>Ilex</i>            | <i>Ilex wilsonii</i>                              | HQ427294.1       |
| Aquifoliaceae      | <i>Ilex</i>            | <i>Ilex suaveolens</i>                            | HQ427293.1       |
| Aquifoliaceae      | <i>Ilex</i>            | <i>Ilex micrococca</i>                            | HQ427290.1       |
| Cannabaceae        | <i>Celtis</i>          | <i>Celtis sinensis</i>                            | MH658966.1       |
| Cannabaceae        | <i>Celtis</i>          | <i>Celtis julianae</i>                            | MN722208.1       |
| Cornaceae          | <i>Cornus</i>          | <i>Cornus controversa</i>                         | U96893.1         |
| Cupressaceae       | <i>Cunninghamia</i>    | <i>Cunninghamia lanceolata</i>                    | AB030125.1       |
| Cupressaceae       | <i>Juniperus</i>       | <i>Juniperus formosana</i>                        | HQ245897.1       |
| Ericaceae          | <i>Rhododendron</i>    | <i>Rhododendron ovatum</i>                        | HQ427297.1       |
| Fabaceae           | <i>Lespedeza</i>       | <i>Lespedeza thunbergii</i> subsp. <i>formosa</i> | JN402952.1       |
| Fagaceae           | <i>Cyclobalanopsis</i> | <i>Cyclobalanopsis stewardiana</i>                | LT984609.1       |
| Fagaceae           | <i>Quercus</i>         | <i>Quercus serrata</i>                            | KX837462.1       |
| Ginkgoaceae Engler | <i>Ginkgo</i> Linn     | <i>Ginkgo biloba</i>                              | AF456370.1       |
| Hamamelidaceae     | <i>Loropetalum</i>     | <i>Loropetalum chinense</i>                       | AB237042.1       |
| Hamamelidaceae     | <i>Fortunearia</i>     | <i>Fortunearia sinensis</i>                       | AF013044.1       |
| Hamamelidaceae     | <i>Loropetalum</i>     | <i>Loropetalum chinense</i>                       | AB237006.1       |
| Lauraceae          | <i>Machilus</i>        | <i>Machilus thunbergii</i>                        | KF569894.1       |
| Lauraceae          | <i>Sassafras</i>       | <i>Sassafras tzumu</i>                            | HQ427277.1       |
| Lauraceae          | <i>Machilus</i>        | <i>Machilus thunbergii</i>                        | KF569900.1       |
| Lauraceae          | <i>Machilus</i>        | <i>Machilus leptophylla</i>                       | KF740396.1       |
| Pentaphylacaceae   | <i>Eurya</i>           | <i>Eurya nitida</i>                               | AY626874.1       |
| Pentaphylacaceae   | <i>Eurya</i>           | <i>Eurya rubiginosa</i> var. <i>attenuata</i>     | KP094855.1       |
| Pinaceae           | <i>Pinus</i>           | <i>Pinus taiwanensis</i>                          | DQ166028.1       |
| Rubiaceae          | <i>Gardenia</i>        | <i>Gardenia jasminoides</i>                       | HQ415291.1       |
| Sapindaceae        | <i>Acer</i>            | <i>Acer negundo</i>                               | HM850603.1       |
| Theaceae           | <i>Camellia</i>        | <i>Camellia fraterna</i>                          | EU579705.1       |

Table S3 Spatial, climatic and topographic variables, which were selected by the forward selection procedure in the RDA, affected nearest taxon index (NTI) of communities for total, trees and shrubs at three different communities. PCNMs (principal coordinates of neighbor matrices) represents spatial predictors; Bio11 (Mean Temperature of Coldest Quarter), Bio9 (Mean Temperature of Driest Quarter); topographic factors include elevation, aspect, slope, and convexity.

| Factor     | Group  | Variables | <i>AdjR<sup>2</sup>Cum</i> | <i>F</i> | <i>P</i> |
|------------|--------|-----------|----------------------------|----------|----------|
| Space      | Total  | PCNM6     | 0.07                       | 22.69    | 0.0004   |
|            |        | PCNM4     | 0.08                       | 6.54     | 0.0098   |
|            |        | PCNM2     | 0.10                       | 6.42     | 0.0089   |
|            | Trees  | PCNM6     | 0.07                       | 25.04    | 0.0001   |
|            |        | PCNM4     | 0.09                       | 5.90     | 0.0182   |
|            |        | PCNM2     | 0.10                       | 4.46     | 0.0386   |
|            | Shrubs | PCNM3     | 0.33                       | 153.71   | 0.001    |
|            |        | PCNM1     | 0.39                       | 30.04    | 0.001    |
|            |        | PCNM30    | 0.41                       | 12.05    | 0.003    |
|            |        | PCNM8     | 0.42                       | 5.37     | 0.014    |
| Climate    | Total  |           |                            |          | NS       |
|            | Trees  | Bio11     | 0.01                       | 5.03     | 0.0241   |
|            | Shrubs | Bio9      | 0.38                       | 189.45   | 0.0001   |
| Topography | Total  |           |                            |          | NS       |
|            | Trees  |           |                            |          | NS       |
|            | Shrubs | Aspect    | 0.11                       | 35.57    | 0.0001   |

Table S4 Description of 19 bioclimatic variables

| Variables | Description                                                |
|-----------|------------------------------------------------------------|
| Bio-1     | Annual Mean Temperature                                    |
| Bio-2     | Mean Diurnal Range (Mean of monthly (max temp - min temp)) |
| Bio-3     | Isothermality (Bio2/Bio7) ( $\times 100$ )                 |
| Bio-4     | Isothermality (Bio2/Bio7) ( $\times 100$ )                 |
| Bio-5     | Max Temperature of Warmest Month                           |
| Bio-6     | Min Temperature of Coldest Month                           |
| Bio-7     | Temperature Annual Range (Bio5-Bio6)                       |
| Bio-8     | Mean Temperature of Wettest Quarter                        |
| Bio-9     | Mean Temperature of Driest Quarter                         |
| Bio-10    | Mean Temperature of Warmest Quarter                        |
| Bio-11    | Mean Temperature of Coldest Quarter                        |
| Bio-12    | Annual Precipitation                                       |
| Bio-13    | Precipitation of Wettest Month                             |
| Bio-14    | Precipitation of Driest Month                              |
| Bio-15    | Precipitation Seasonality (Coefficient of Variation)       |
| Bio-16    | Precipitation of Wettest Quarter                           |
| Bio-17    | Precipitation of Driest Quarter                            |
| Bio-18    | Precipitation of Warmest Quarter                           |
| Bio-19    | Precipitation of Coldest Quarter                           |
